# Supplementary material for: Prodrug-Activating Chain Exchange (PACE) converts targeted prodrug derivatives to functional bi- or multispecific antibodies
Source: publisher site journal article supplement (doi:10.1515/hsz-2021-0401), 2022-01-20
Supplement: Supplementary file [file j_hsz-2021-0401_suppl.pdf]

# Prodrug-Activating Chain Exchange (PACE) converts targeted prodrug derivatives to functional bi- or multispecific antibodies

Steffen Dickopf, Can Buldun, Vedran Vasic, Guy Georges, Carina Hage, Klaus Mayer, Matthias Forster, Uwe Wessels, Kay-Gunnar Stubenrauch, Jörg Benz, Andreas Ehler, Matthias E. Lauer, Philippe Ringler, Sebastian Kobold, Stefan Endres, Christian Klein and Ulrich Brinkmann

## Supplementary material

Fig. S1

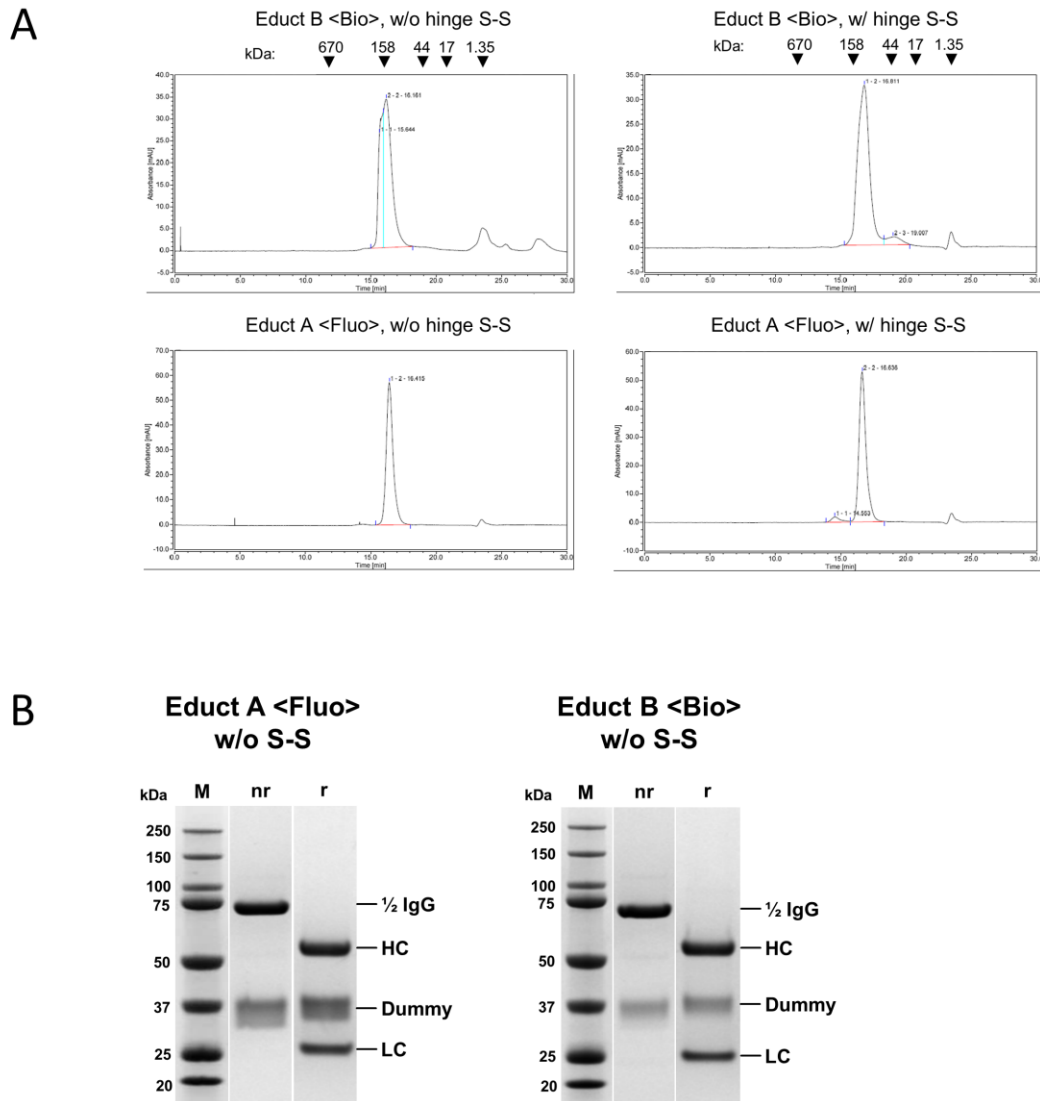

**Figure S1** Analytics of ForCE educts from Figure 1.

(A) Analytical SEC chromatograms of ForCE educts with and without hinge disulfides. Fab arms are directed against biocytinamide or fluorescein: <Bio> and <Fluo>. Approximate molecular weights are indicated, as determined from a defined molecular weight standard. (B) SDS-PAGE and Coomassie blue staining of ForCE educts lacking hinge disulfides in non-reducing (nr) and

reducing conditions (r) indicates the assembly of heavy chain (HC), light chain (LC), and dummy chain in the expected stoichiometry.
